# Supplementary material for: Small-molecule modulators of B56-PP2A restore 4E-BP function to suppress eIF4E-dependent translation in cancer cells
Source: JCI journal article supplement (doi:10.1172/jci176093), 2025-01-27
Supplement: sd1 [file 1]

## Supplemental Figure S1

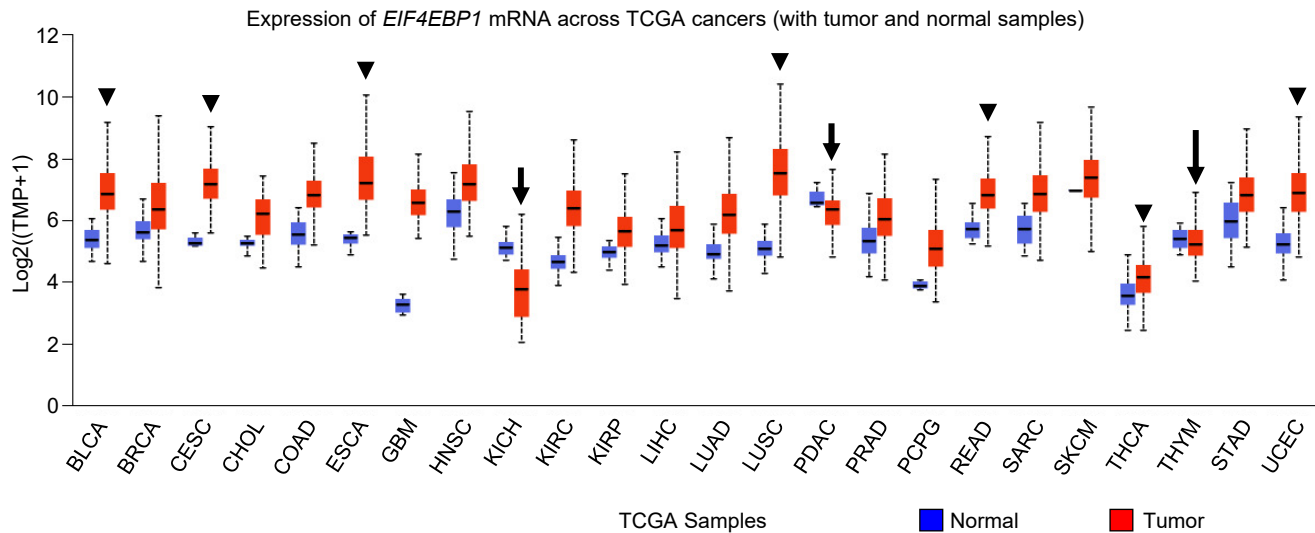

**Figure S1. Expression 4E-BP1 mRNA in tumors.** TCGA RNAseq data for the expression of *4E-BP1* (*EIF4EBP1*) mRNA in the indicated normal and tumor tissues analyzed using the UALCAN portal. The arrows and arrowheads indicate tumor types in which *4E-BP1* mRNA is downregulated or upregulated relative to normal tissue, respectively.

## Supplemental Figure S2

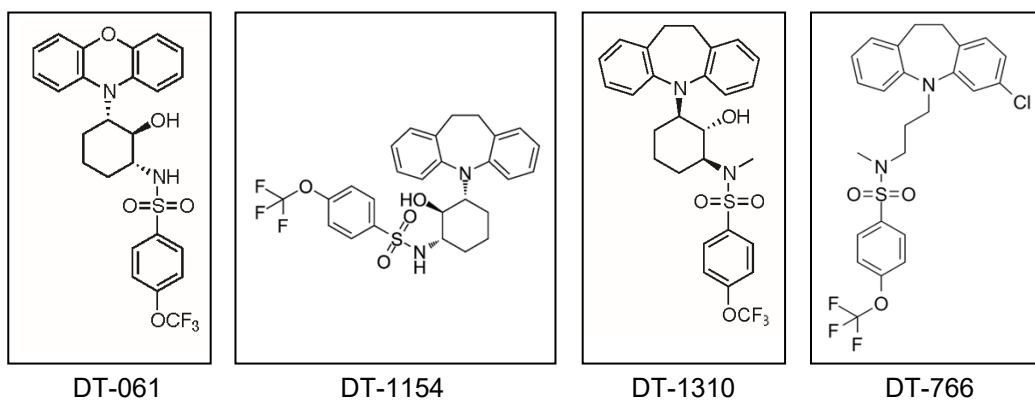

**Figure S2. Chemical structure of DT-061, DT-1154, DT-1310, and DT-766.**

**Supplemental Figure S3**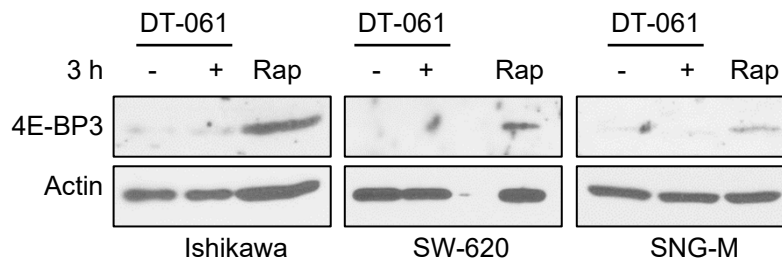

**Figure S3. SMAPs do not induce upregulation of 4E-BP3.** The indicated cells were treated with vehicle or 20  $\mu$ M DT-061 for 3 h (Ishikawa, SW-620) or 5 h (SNG-M) and analyzed by immunoblotting. Rap: Extracts of MiaPaCa-2 cells treated with 10 nM rapamycin for 24 h to upregulate 4E-BP3 (38) used as a positive control.

## Supplemental Figure S4

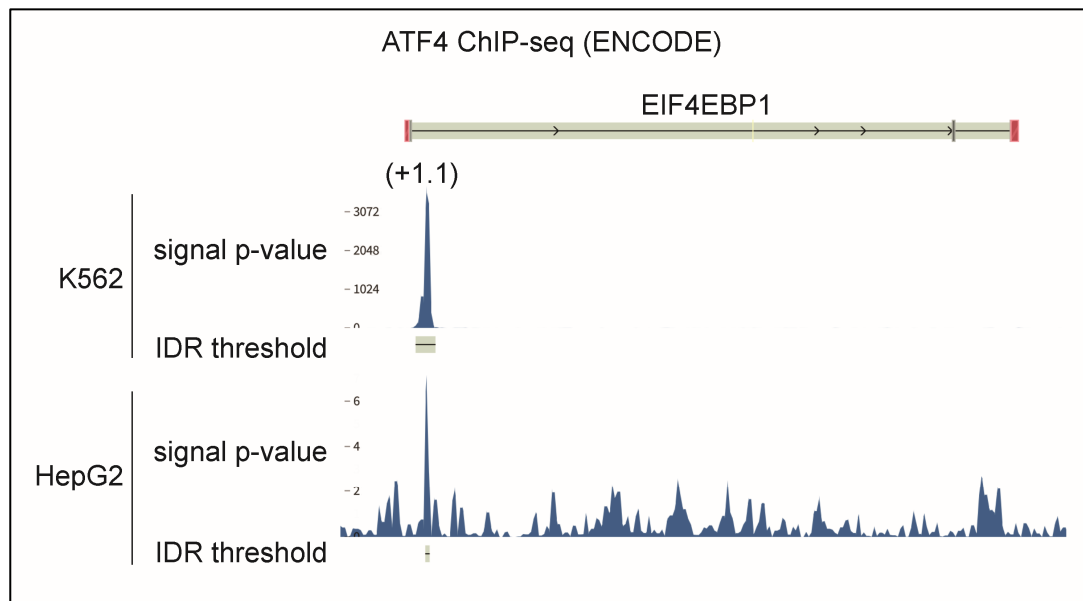

**Figure S4.** ATF4 ChIP-seq data in K562 and HepG2 cells from the ENCODE database. The number in parentheses above the peak represents its distance relative to the TSS.

## Supplemental Figure S5

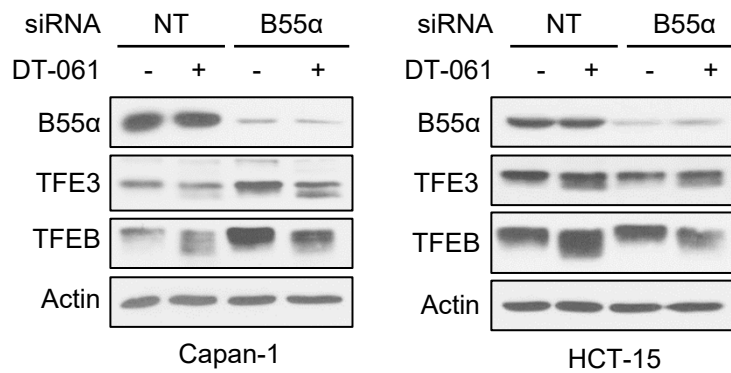

**Figure S5. B55 $\alpha$ -PP2A does not mediate the effects of SMAPs on TFE3 and TFEB.** Cell lines were transfected with non-targeting (NT) or B55 $\alpha$ -targeting siRNA 72 h prior to treatment with vehicle or 20  $\mu$ M DT-061 for 1 h, and expression and electrophoretic mobility of the indicated proteins were determined by immunoblotting.

## Supplemental Figure S6

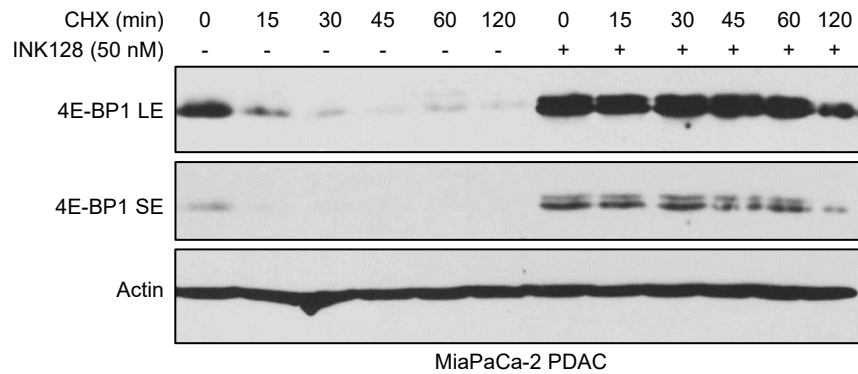

**Figure S6. mTOR inhibition with INK128 leads to stabilization of 4E-BP1 protein.** MiaPaCa-2 cells were treated with INK128 20 minutes prior to addition of 100  $\mu$ g/ml CHX and cells were processed for immunoblotting at the indicated times. LE: longer exposure; SE: shorter exposure.
